# Supplementary material for: New insights into the electrochemical performance of precursor derived Si(Nb)OC composites as anode materials for batteries
Source: Royal Society of Chemistry journal article supplement (doi:10.1039/d3ra04825j), 2023-01-01
Supplement: d3ra04825j1.pdf [file d3ra04825j1.pdf]

### Supplementary data

S S Lokesh Vendra<sup>1,2</sup>, Gurpreet Singh<sup>2\*</sup>, Ravi Kumar<sup>1,3\*</sup>

<sup>1</sup>Laboratory for High Performance Ceramics, Department of Metallurgical and Materials Engineering, Indian Institute of Technology-Madras (IIT Madras), Chennai 600036, India.

<sup>2</sup>Department of Mechanical and Nuclear Engineering, Kansas State University Manhattan, KS, USA 66502

<sup>3</sup>Centre of Excellence on Ceramic Technologies for Futuristic Mobility, Indian Institute of Technology, Madras (IIT Madras), Chennai 600036, India

\*Corresponding authors

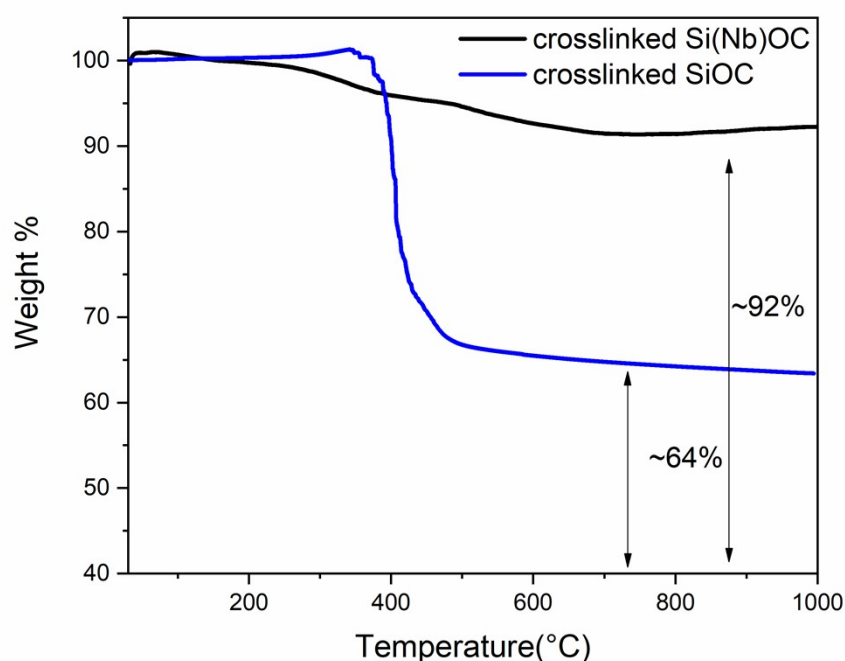

**Fig. S1** Thermogravimetric analysis of crosslinked Si(Nb)OC shows Nb modification improves the stability of Si(Nb)OC composites due to suppressed decomposition of Si-O-C bonds

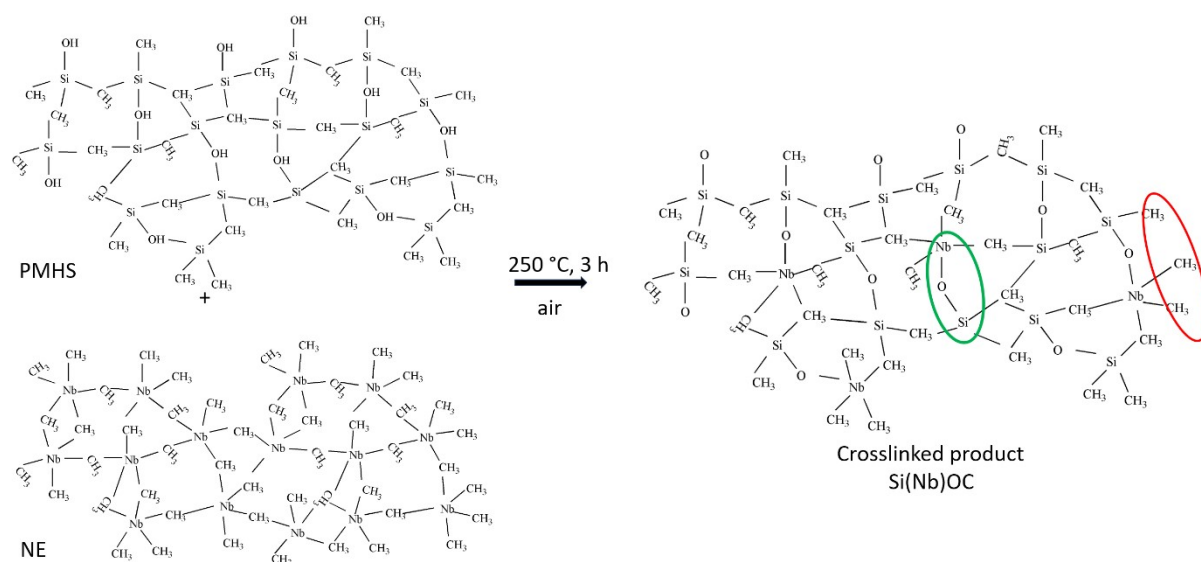

**Fig. S2** Chemical structure of initial precursors and crosslinked product of modified PMHS:NE showing Si-O-Nb linkage (green) and methyl groups (red), subsequent heating which leads to produced in situ segregated carbon and amorphous Si(Nb)OC structure.

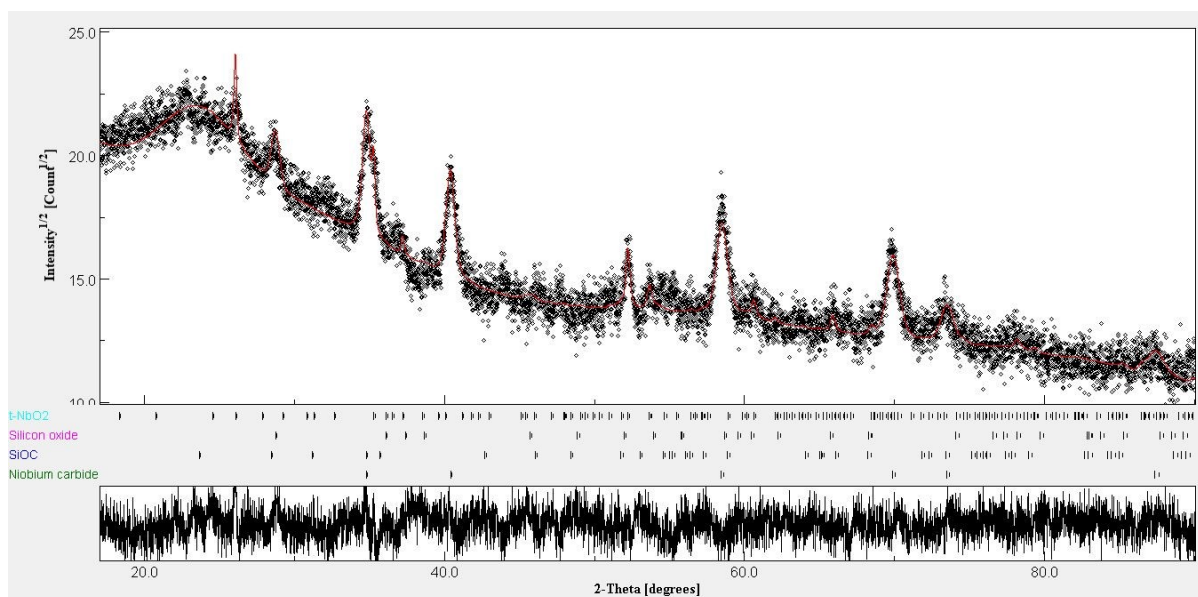

**Fig. S3.** Rietveld refinement of Si(Nb)OC composites using MAUD software

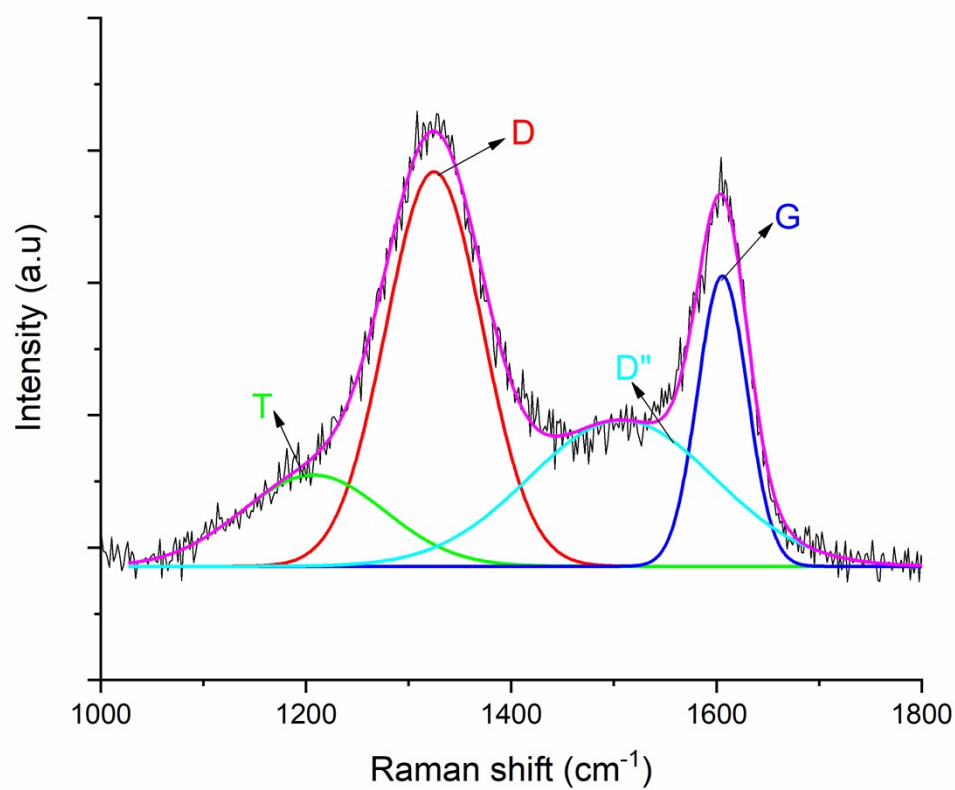

**Fig S4.** Raman spectrum deconvoluted peaks D and G peaks of annealed Si(Nb)OC.

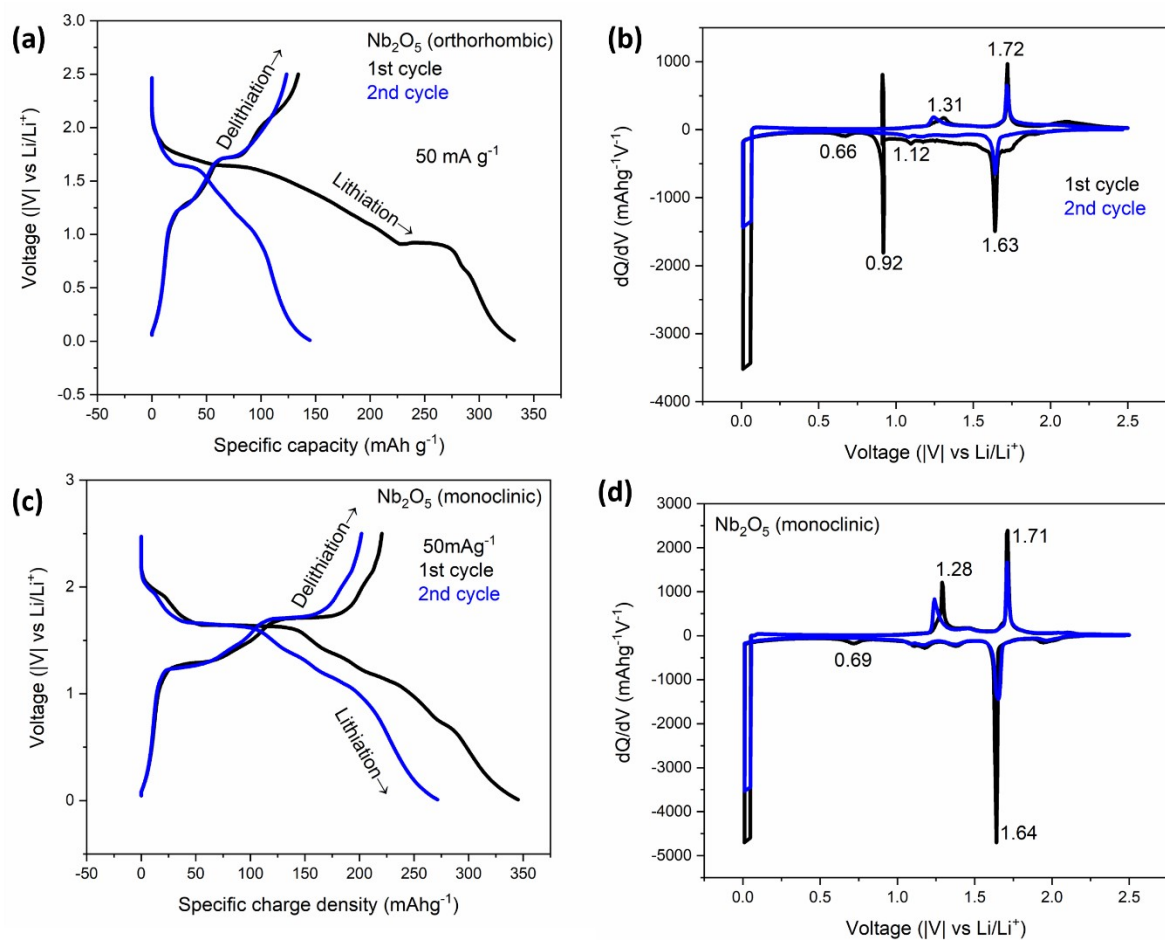

**Fig. S5** Charge-discharge curves and respective differentiated capacity curves of pure  $\text{Nb}_2\text{O}_5$  (a-b) orthorhombic  $\text{Nb}_2\text{O}_5$  (900 °C) and (c-d) monoclinic  $\text{Nb}_2\text{O}_5$  (1200 °C)

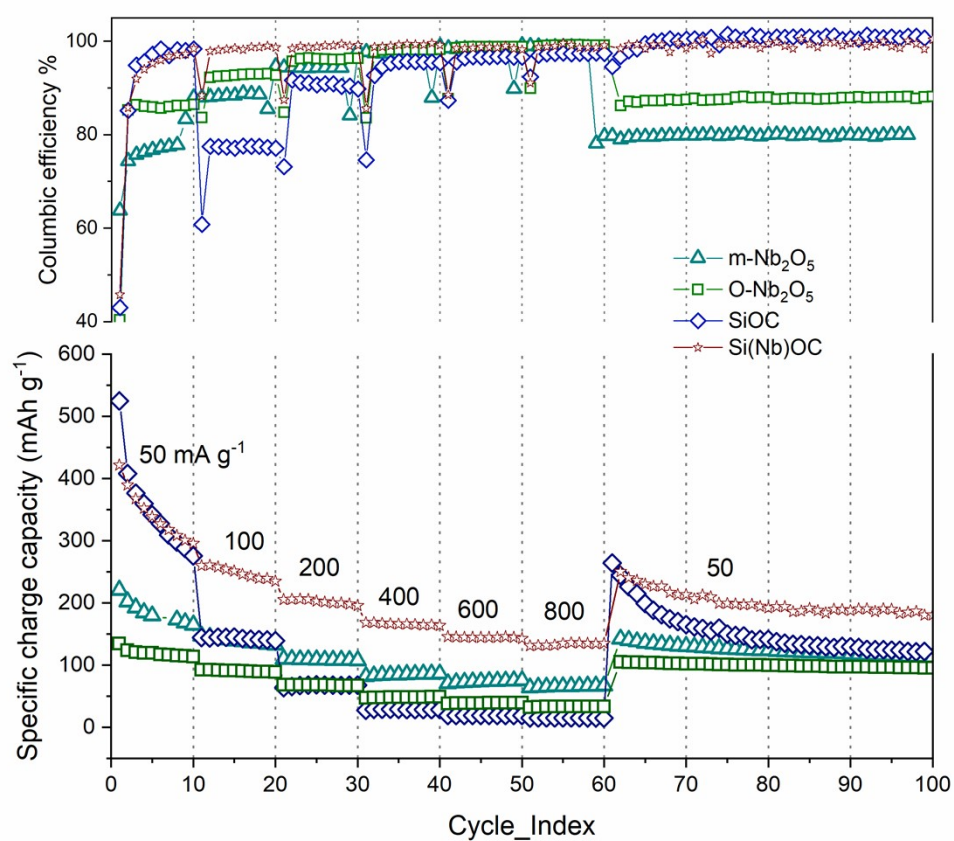

**Fig. S6** Cyclic stability of pure  $\text{Nb}_2\text{O}_5$  and as-pyrolyzed  $\text{Si(Nb)OC}$  composite anodes when cycled asymmetrically at increasing current densities and their respective coulombic efficiency
